# Supplementary material for: The Therapeutic Relationship as Predictor of Change in Music Therapy with Young Children with Autism Spectrum Disorder
Source: Springer Nature journal article supplement (doi:10.1007/s10803-017-3306-y), 2017-09-21
Supplement: MOESM2 [file 15080052]

**Supplementary Material**

*Online Resource 1***.** Direct acyclic graph (DAG) of the statistical model examined

Based on clinical considerations, direct causal relations between variables that could potentially confound with the variables of the target relation have been drawn in the DAG (Textor et al., 2011). The green arrow marks the targeted relation. Different colors mark different types of variables as follows:

- green: exposure (AQR match rate) or ancestor of exposure

- blue: outcome (ADOS) or ancestor of outcomes

- grey: unobserved variables

- white: necessary adjustment variables for estimation of the total effect

- red: remaining ancestors of both exposure and outcome which do not affect the estimation of the total effect after the necessary adjustments.

The DAG analysis suggested a model adjusted for diagnosis, MT intensity, site, therapist and IQ. According to the DAG it was not necessary to adjust for age if adjusting for IQ. However, due to many missing values for IQ (10, 21%) in our data, we decided not to adjust for IQ.

Instead we adjusted for age because this closed some of the remaining open paths.

*Note.* ADOS – Autism Diagnostic Observation Schedule. AQR – Assessment of the Quality of Relationship. MT – Music therapy. IQ – Intelligence Quotient.
